# Supplementary material
Source: PubMed Central journal article supplement (PMC4078414)
Supplement: bonekey201438-s1.pdf [file bonekey201438-s1.pdf]

**Supplemental Table1: Primer sequences of RT-PCR**

| <b>Specificity</b> | <b>Gene</b>  | <b>Forward (5' to 3')</b>         | <b>Reverse (3' to 5')</b>         |
|--------------------|--------------|-----------------------------------|-----------------------------------|
| Mouse              | <i>Fgf23</i> | CCC CCA TCA GAC CAT CTA CAG TGC   | GAA GTG AAG CGA TCC AAA AAT GTT   |
|                    | <i>Runx2</i> | GGA GCG GAC GAG GCA AGA GTT TCA   | CGG GGA CCG TCC ACT GTC ACT TTA   |
|                    | <i>Osx</i>   | GAT GGC GTC CTC TCT GCT TGA       | CAG CGT ATG GCT TCT TTG TGC       |
|                    | <i>Alp</i>   | GCT GGT GGA AGG AGG CAG GAT TGA   | GGG AGC CAG ACC AAA GAT GGA GTT   |
|                    | <i>Opn</i>   | CCA GGT TTC TGA TGA ACA GTA TCC   | CAT CGA GGG ACT CCT TAG ACT CAC   |
|                    | <i>Col1a</i> | GTC CTT CTG GTC CTC GTG GTC TC    | CCA GCT TCC CCA TCA TCT CCA TT    |
|                    | <i>Osc</i>   | ACA CCA TGA GGA CCA TCT TTC TGC   | CCT GCT TGG ACA TGA AGG CTT TGT   |
|                    | <i>Dmp1</i>  | TGT GCT CTC CCA GTT GCC AGA TAC C | CTG CTG TCC GTG TGG TCA CTA TTT G |
|                    | <i>Sost</i>  | CCC GAG CCT CCT CCT GAG AAC AAC   | CGG ACA CAT CTT TGG CGT CAT AGG   |
| Rat                | <i>Fgf23</i> | CGG AAC ACC CCA TCA GAC TAT CT    | AGC CGT TCT CTA GCG TCC ACT GG    |
|                    | <i>Runx2</i> | GGA GCG GAC GAG GCA AGA GTT TCA   | CGG GGA CCG TCC ACT GTC ACT TTA   |
|                    | <i>Osx</i>   | TCC CTA TCC AGC ACC CCA CCT CTT   | CTC CCC TCC AGT TGC CCA CTA TTG   |
|                    | <i>Alp</i>   | GCT AGT GGA AGG AGG CAG GAT TGA   | GGG AGC CAG ACC AAA AAT GGA GTT   |
|                    | <i>Opn</i>   | GTC CTT CAC TGC CAG CAC ACA AGC   | GGC ATC GGG ATA CTG TTC ATC AG    |
|                    | <i>Col1a</i> | CGG AAT GAA GGG ACA CAG AGG TT    | ACC GAC AGC ACC ATC GTT ACC AC    |
|                    | <i>Osc</i>   | CTG CAT TCT GCC TCT CTG ACC TG    | GCT GGG GCT CCA AGT CCA TTG TT    |
|                    | <i>Dmp1</i>  | CGC ATC CCA ATA TGA AGA CTG TTA T | ACT GAG CCA AAT TGC CCG TCC TCT C |
|                    | <i>Sost</i>  | ACC GAG TGC CCT TCC TCC TTC       | ACC CCT GGC TCT CCA CAG CAA       |
